# Supplementary material for: The kinematic and physiological pilot study on obstacle properties for young adults with visual and hearing impairments
Source: Research Square preprint supplement (doi:10.21203/rs.3.rs-4787024/v1), 2024-09-02
Supplement: Supplementary file 1 [file 53308d15c3f23d7f1d31e221.docx]

**Graph legends**

Figure1. Flow chart enrollment:

Figure1 illustrated the flow chart, as showing participants as volunteers who meet the recruitment criteria on posters in public facilities.

Figure 2. Procedure and measurement setup: Figure 2 shows the procedure and measurement setup in this study. Participants performed an orthostatic tolerance test measured by HRV analysis. We also measured hand grip strength and conducted a Quality of Life (SF-8) survey. Additionally, body composition and API/AVI were measured.

Figure3. The results of the SF-8 Quality of Life (QOL) assessment (PCS (A) and MCS (B)) for the three groups:

The results from PCS (A) and MCS (B) did not show any significant differences among the three groups.

Figure4. Changes in HR and SBP when standing up. Graphs show (A) HR and (B) SBP when standing from the sitting position:

Graph (A) shows that HR significantly changed when standing up among the three groups (P = 0.015). Furthermore, a significant difference was observed between the H group and the HI group (P = 0.003). Graph (B) shows that SBP did not change when standing up among the three groups and when standing from the sitting position in all groups.

Figure 5. HRV indices in the sitting position. Graphs show changes in CVRR (A), HF (B), and L/H (C) in the sitting position before and after the orthostatic tolerance test:

Graph (A) shows that CVRR significantly changed in the sitting position before and after the orthostatic tolerance test (P = 0.0178). Furthermore, a significant difference was observed between the VI group and the HI group (P = 0.0265). Graph (B) shows that HF significantly changed in the sitting position before and after the orthostatic tolerance test between the H group and the HI group, as well as between the HI and VI groups (P = 0.0004). Graph (C) shows that L/H did not change before and after the orthostatic tolerance test and among the three groups.

Figure6. The results of the arterial stiffness indicators (API (A) and AVI (B)) assessment for the three groups:

The results of the API measurements indicated that the standard value for the API is between 20 and 33. The average value for the HI group exceeded this standard range. A significant difference was observed between the H group and the HI group (P = 0.013). The results of the AVI measurements indicated that the standard value for the AVI is between 17 and 31. The average value for the HI group exceeded this standard range. A significant difference was observed between the H group and the HI group (P = 0.045).

Figure 7. Correlation between each parameter in the VI group and the HI group, CVRR-sitting and API in the VI group(A) and L/H standing position and in HI group (B):

The graph (A) showed significantly correlated CVRR and API in the VI group (r= -0.64; p=0.04). The graph (B) showed significantly correlated L/H and API (r= 0.57; p=0.04).
