# Supplementary material for: The kinematic and physiological pilot study on obstacle properties for young adults with visual and hearing impairments
Source: Research Square preprint supplement (doi:10.21203/rs.3.rs-4787024/v1), 2024-09-02
Supplement: Supplementary file 2 [file 626e11fee750f33df5190213.docx]

**Supporting Table**

**S1 Table Absolute and normalized values of HRV indices in the sitting position**

|  | | Healthy Adult (n=11) | Visual impairment(n=10) | Hearing impairment (n=13) |
| --- | --- | --- | --- | --- |
| CVRR (%) | Before | 4.86 ± 2.04 | 4.00 ± 1.19 | 4.27 ± 0.22 |
| After | 3.84 ± 1.89* | 4.57 ± 1.04* | 4.04 ± 0.29*, ‡ |
| HF (ms2) | Before | 244.64 ± 35.27 | 140.24 ± 92.59 | 237.76 ± 40.29 |
| After | 212.52 ± 22.73 | 168.60 ± 91.36 | 132.01 ± 20.49‡‡, ✟✟ |
| L/H | Before | 3.35 ± 0.96 | 3.71 ± 4.90 | 4.15 ± 6.11 |
| After | 3.14 ± 0.79 | 4.01 ± 5.36 | 1.76 ± 1.28 |

Data are expressed as means and SD.

CVRR: Coefficient of Variation of R-R Interval; HF: High Frequency Power; L/H: Low Frequency Power/High Frequency Power

* P < 0.05 vs before the orthostatic tolerance test; ‡ P < 0.05, ‡‡ P < 0.01 vs the Healthy adult group

; ✟P < 0.05, ✟✟ P < 0.01 vs the Visual impairment group
