# Supplementary material for: The kinematic and physiological pilot study on obstacle properties for young adults with visual and hearing impairments
Source: Research Square preprint supplement (doi:10.21203/rs.3.rs-4787024/v1), 2024-09-02
Supplement: Supplementary file 3 [file ad16018fddca03ffe4d839a1.docx]

Table 1. Demographic data

| Parameter | *Healthy Adult  (n*=11) | *Visual impairment  (n*=10) | *Hearing impairment  (n*=13) |
| --- | --- | --- | --- |
| Age (years) | 28.9 ±5.6 | 21.3±1.8☨ | 21.1±1.3☨ |
| Male / female | 8 / 3 | 8/ 2 | 12 / 1 |
| BMI (kg / m2) | 21.4 ±3.1 | 21.1 ±3.6 | 22.6 ±2.7 |
| Hand grip (kg) | 36.7 ±10.8 | 37.3 ±11.7 | 37.0 ±10.0 |
| Skeletal muscle mass (kg) | 45.5 ± 9.1 | 47.2 ± 7.7 | 47.1 ± 6.2 |
| Bone mineral (kg) | 2.6 ± 0.4 | 2.6 ± 0.4 | 2.6 ± 0.3 |
| Body fat (％) | 22.1 ± 7.3 | 18.9 ± 6.0 | 20.1 ± 6.4 |
| 1)Power (Reference Value: 0.5~2.0) | 1.5± 0.2 | 1.5± 0.2 | 1.6± 0.2 |
| 1)Speed (Reference Value: 1.0~25.0) | 11.4± 3.7 | 69.9± 3.0 | 1.6± 0.2 |
| 1)Balance (Reference Value: 1.0~99.0) | 53.2± 8.7 | 57.0± 9.5 | 53.2± 8.7 |
| Sedentary time (hour / day) | 5.6 ± 2.1 | 13.9 ± 2.1 | 7.6 ± 2.3 |
| Physical activities (steps / day) | 6666.6 ± 3248.9 | 5250.0± 1833.7 | 5538.5 ± 1823.6 |

Values represent the mean ± standard deviation. ☨P<0.05 vs the H group. 1) From the analysis software of the zaRitz BM-220, the results quantified power, speed, and balance during the chair rise test. The standard values are indicated in parentheses. Visual impairment: Individuals whose corrected visual acuity is generally less than 0.3 in both eyes or who, despite the use of magnifying so as glasses or similar aids, are unable to visually recognize normal text, figures or find it extremely difficult to do. Leber’s disease, Retinal pigment degeneration, Ocular defect, and visual impairment of unknown cause. Hearing impairment: Individuals with a hearing level of approximately 60 decibels or more in both ears, or those who, even with the use of hearing aids, are unable to comprehend ordinary spoken voice or find it extremely difficult to do so. All subjects are hearing impairment of unknown. BMI: Body Mass Index

Table 2. HR, SBP and DBP in the sitting position before and after Orthostatic tolerance test.

| Parameter | *Healthy Adult  (n*=11) | *Visual impairment  (n*=10) | *Hearing impairment  (n*=13) |
| --- | --- | --- | --- |
| HR (beats /min) Before | 73.0± 8.1 | 80.3± 14.8 | 70.8± 10.7 |
| After | 77.8± 10.6 | 81.2± 13.5 | 76.8± 11.0 |
| SBP (mmHg) Before | 112.8± 12.9 | 111.7± 9.0 | 119.3± 10.7 |
| After | 114.7± 10.7 | 111.4± 9.1 | 117.5± 12.0 |
| DBP (mmHg) Before | 74.3± 11.7 | 69.9± 3.0 | 76.4± 8.3 |
| After | 77.8± 10.6 | 81.2± 13.5 | 76.8± 11.0 |

Values represent the mean ± standard deviation.
HR: heart rate; SBP: systolic blood pressure; DBP: diastolic blood pressure.
