# Supplementary material for: The kinematic and physiological pilot study on obstacle properties for young adults with visual and hearing impairments
Source: Research Square preprint supplement (doi:10.21203/rs.3.rs-4787024/v1), 2024-09-02
Supplement: Supplementary file 4 [file ef4f20399d94750ef921efd4.docx]

Table 2. HR, SBP and DBP in the sitting position before and after Orthostatic tolerance test.

| Parameter | *Healthy Adult  (n*=11) | *Visual impairment  (n*=10) | *Hearing impairment  (n*=13) |
| --- | --- | --- | --- |
| HR (beats /min) Before | 73.0± 8.1 | 80.3± 14.8 | 70.8± 10.7 |
| After | 77.8± 10.6 | 81.2± 13.5 | 76.8± 11.0 |
| SBP (mmHg) Before | 112.8± 12.9 | 111.7± 9.0 | 119.3± 10.7 |
| After | 114.7± 10.7 | 111.4± 9.1 | 117.5± 12.0 |
| DBP (mmHg) Before | 74.3± 11.7 | 69.9± 3.0 | 76.4± 8.3 |
| After | 77.8± 10.6 | 81.2± 13.5 | 76.8± 11.0 |

Values represent the mean ± standard deviation.
HR: heart rate; SBP: systolic blood pressure; DBP: diastolic blood pressure.
